# Supplementary material
Source: PubMed Central journal article supplement (PMC6613390)
Supplement: NIHMS1530238-supplement-1.pdf [file NIHMS1530238-supplement-1.pdf]

**Supplementary Table 1. Inpatient CPT Codes**

| <b>Category</b>                                          | <b>CPT Codes</b>                                              |
|----------------------------------------------------------|---------------------------------------------------------------|
| Hospital Observation Services                            | 99217, 99218, 99219, 99220, 99224, 99225, 99226               |
| Initial Hospital Inpatient Care Services                 | 99221, 99222, 99223                                           |
| Subsequent Hospital Care Services                        | 99231, 99232, 99233, 99234, 99235, 99236, 99237, 99238, 99239 |
| New or Established Patient Emergency Department Services | 99281, 99282, 99283, 99284, 9285                              |
| Other Emergency Department Services                      | 99288                                                         |

**Supplementary Table 2. ICD-9 Codes for Charlson Comorbidity Score**

| <b>Charlson Comorbidity Score Components</b>                                       | <b>ICD-9 Codes</b>                                                                                 |
|------------------------------------------------------------------------------------|----------------------------------------------------------------------------------------------------|
| Myocardial infarction                                                              | 410.0-410.92,412                                                                                   |
| Congestive heart failure                                                           | 428.0-428.9                                                                                        |
| Peripheral vascular disease                                                        | 443.9, 441.0-441.9,785.4, V43.4                                                                    |
| Cerebrovascular disease                                                            | 430.0-438.9                                                                                        |
| Dementia                                                                           | 290.0-290.9                                                                                        |
| Chronic pulmonary disease                                                          | 490, 491.0-491.9, 492, 492.0, 492.8, 493.0-493.92,494-494.1, 495.0-495.9,496, 500-505, 506.0-506.4 |
| Rheumatic disease                                                                  | 710.0, 710.1, 710.4, 714.0-714.2, 714.81, 725                                                      |
| Peptic ulcer disease                                                               | 531.0-534.91                                                                                       |
| Mild liver disease                                                                 | 571.2, 571.4-571.6                                                                                 |
| Diabetes without chronic complication                                              | 250.0-250.3, 250.7                                                                                 |
| Diabetes with chronic complication                                                 | 250.4-250.6                                                                                        |
| Hemiplegia or paraplegia                                                           | 344.1, 342.0-342.92                                                                                |
| Renal disease                                                                      | 582.0-582.9, 583.0-583.7, 585.1-585.9, 586, 588.0-588.9                                            |
| Any malignancy, including lymphoma and leukemia, except malignant neoplasm of skin | 140.0-172.9, 174.0-195.8, 200.0-208.92                                                             |
| Moderate or severe liver disease                                                   | 456.0-456.21, 572.2-572.8                                                                          |
| Metastatic solid tumor                                                             | 196.0-199.1                                                                                        |
| AIDS/HIV                                                                           | 042                                                                                                |

**Supplementary Table 3. Anti-hypertensive Classes and Generic Medications**

| <b>Medication Class</b>                 | <b>Medication Names</b>                                                                                                                                                                                                                                                                                                                                                                                                                                                                                                                                                                       |
|-----------------------------------------|-----------------------------------------------------------------------------------------------------------------------------------------------------------------------------------------------------------------------------------------------------------------------------------------------------------------------------------------------------------------------------------------------------------------------------------------------------------------------------------------------------------------------------------------------------------------------------------------------|
| Angiotensin converting enzyme inhibitor | fosinopril, fosinopril sodium, ramipril, captopril, moexipril, lisinopril, enalapril, quinapril, trandolapril, benazepril, perindopril, monopril                                                                                                                                                                                                                                                                                                                                                                                                                                              |
| Angiotensin receptor blocker            | eprosartan, azilsartan medoxomil, olmesartan, valsartan, telmisartan, losartan, candesartan, irbesartan                                                                                                                                                                                                                                                                                                                                                                                                                                                                                       |
| Beta-blockers                           | betaxolol, acebutolol, atenolol, metoprolol, metoprolol succinate, metoprolol tartrate, nebivolol, bisoprolol, esmolol, propranolol, nadolol, labetalol, timolol, carteolol, penbutolol, pindolol, carvedilol                                                                                                                                                                                                                                                                                                                                                                                 |
| Calcium channel blockers                | nifedipine, diltiazem, verapamil, isradipine, felodipine, amlodipine, nicardipine, nisoldipine, bepridil, clevidipine                                                                                                                                                                                                                                                                                                                                                                                                                                                                         |
| Others                                  | aliskiren, hydralazine, minoxidil, hydralazine/isosorbide dinitrate, reserpine, eplerenone, spironolactone, prazosin, prazosin hydrochloride, terazosin, terazosin hydrochloride, doxazosin, bumetanide, ethacrynic acid, ethacrynate, torsemide, furosemide, triamterene, spironolactone, amiloride, furosemide/amiloride, indapamide, chlorthalidone, metolazone, hydrochlorothiazide, methylchlorothiazide, chlorothiazide, bendroflumethiazide, bendrofluazide, polythiazide, hydroflumethiazide, cyclothiazide, benzthiazide, clonidine, guanfacine, methyldopa, methyldopate, guanabenz |

**Supplementary Table 4.** SBP CV and Use of Immunosuppressants and Immunomodulators in Patients with SLE

|                          | <b>Number of Users<br/>(N=899)</b> | <b>Median SBP CV<br/>of Users</b> | <b>Median SBP CV<br/>of Non-users</b> | <b>p-value</b> |
|--------------------------|------------------------------------|-----------------------------------|---------------------------------------|----------------|
| Cyclophosphamide         | 198 (22)                           | 10.96 [8.7-13.05]                 | 9.43 [7.68-11.41]                     | <0.001         |
| Mycophenolate<br>mofetil | 319 (35)                           | 9.91 [8.19-12.35]                 | 9.61[7.70-11.46]                      | 0.02           |
| Azathioprine             | 385 (43)                           | 9.77 [7.84-11.88]                 | 9.66 [7.91-11.79]                     | 0.57           |
| Corticosteroids          | 700 (78)                           | 9.84 [8.00-11.83]                 | 9.25 [7.29-11.56]                     | 0.03           |
| Other                    | 460 (51)                           | 9.84 [8.05-11.91]                 | 9.58 [7.60-11.78]                     | 0.11           |

Values are presented as N (%) or median [interquartile range].

**Supplementary Table 5.** SBP CV and Use of Anti-hypertensives in Patients with SLE

|                                         | <b>SBP CV of Users</b> | <b>SBP CV of Non-users</b> | <b>p-value</b> |
|-----------------------------------------|------------------------|----------------------------|----------------|
| Angiotensin converting enzyme inhibitor | 10.91 [8.98-13.02]     | 9.09 [7.38-10.92]          | <0.001         |
| Angiotensin receptor blocker            | 11.08 [8.94-13.43]     | 9.33 [7.58-11.15]          | <0.001         |
| Beta-blockers                           | 10.76 [8.80-12.91]     | 9.02 [7.30-10.74]          | <0.001         |
| Calcium channel blockers                | 10.81 [9.04-13.29]     | 9.06 [7.41-11.08]          | <0.001         |
| Others                                  | 10.50 [8.69-12.77]     | 8.87 [7.14-10.61]          | <0.001         |

Values are presented as number (percent) or median [interquartile range].

**Supplementary Table 6.** Factors Associated with DBP CV in SLE Patients

|                                      | <b>Spearman Coefficient</b> | <b>p-value</b> |
|--------------------------------------|-----------------------------|----------------|
| Age (years)                          | 0.01                        | 0.69           |
| Body mass index (kg/m <sup>2</sup> ) | 0.01                        | 0.80           |
| Creatinine (mg/dL)                   | 0.12                        | <0.001         |
| C-reactive protein (mg/L)            | 0.16                        | <0.001         |
| HDL cholesterol (mg/dL)              | -0.12                       | 0.01           |
| LDL cholesterol (mg/dL)              | 0.08                        | 0.11           |
| Triglycerides (mg/dL)                | 0.18                        | <0.001         |
| C3 (mg/dL)                           | -0.03                       | 0.33           |
| C4 (mg/dL)                           | 0.04                        | 0.22           |
| Charlson comorbidity score           | 0.20                        | <0.001         |
